1 Resolving phylogeny and polyploid parentage using genus-wide  
2 genome-wide sequence data from birch trees

3

4 Nian Wang<sup>1,2</sup>, Laura J. Kelly<sup>1,3</sup>, Hugh A. McAllister<sup>4</sup>, Jasmin Zohren<sup>5</sup>, Richard J. A.  
5 Buggs<sup>1,3\*</sup>

6 <sup>1</sup>School of Biological and Chemical Sciences, Queen Mary University of London,  
7 Mile End Road, London E1 4NS, UK.

8 <sup>2</sup>School of Forestry, Shandong Agricultural University, Taian 271018, Shandong  
9 province, China.

10 <sup>3</sup>Royal Botanic Gardens Kew, Richmond, Surrey TW9 3AB, UK.

11 <sup>4</sup>Institute of Integrative Biology, Biosciences Building, University of Liverpool,  
12 Crown Street, Liverpool L69 7ZB, UK.

13 <sup>5</sup>Sex Chromosome Biology Lab, the Francis Crick Institute, 1 Midland Road, London,  
14 NW1 1AT UK

15 \*Corresponding author: Richard Buggs, Email: [r.buggs@kew.org](mailto:r.buggs@kew.org) or  
16 [r.buggs@qmul.ac.uk](mailto:r.buggs@qmul.ac.uk) Tel: 02083325755

17

18

19

20

21 **Abstract**

22 Numerous plant genera have a history including frequent hybridisation and  
23 polyploidisation, which often means that their phylogenies are not yet fully resolved.  
24 The genus *Betula*, which contains many ecologically important allopolyploid tree  
25 species, is a case in point. We generated genome-wide sequence data for 27 diploid  
26 and 31 polyploid *Betula* species or subspecies using restriction site associated DNA  
27 (RAD) sequences assembled into contigs with a mean length of 675 bp. We  
28 reconstructed the evolutionary relationships among diploid *Betula* species using both  
29 supermatrix and species tree methods. We identified progenitors of the polyploids  
30 according to the relative rates at which their reads mapped to contigs from different  
31 diploid species. We sorted the polyploid reads into different putative sub-genomes and  
32 used the extracted contigs, along with the diploid sequences, to build new phylogenies  
33 that included the polyploid sub-genomes. This approach yielded a highly evidenced  
34 phylogenetic hypothesis for the genus *Betula*, including the complex reticulate origins  
35 of the majority of its polyploid taxa. The genus was split into two well supported  
36 clades, which differ in their seed-wing morphology. We propose a new taxonomy for  
37 *Betula*, splitting it into two subgenera. We have resolved the parentage of many  
38 widespread and economically important polyploid tree species, opening the way for  
39 their population genomic study.

40

41 **Key words:** polyploidy, whole genome duplication, hybridization, phylogenomics,

42 *Betula*

43

44

## 45 1. Introduction

46

47 The evolution of plant diversity cannot be fully understood unless we can reconstruct  
48 evolutionary relationships for allopolyploids (hybrid species with duplicated  
49 genomes). While phylogenomic approaches that use thousands of loci can resolve the  
50 phylogenies of diploid taxa with a history of hybridization (Folk et al., 2017; Fontaine  
51 et al., 2015; Li et al., 2016), allopolyploids, which are common in plants (Barker et al.,  
52 2016), remain hard to place in phylogenetic trees (Oxelman et al., 2017). When  
53 molecular markers are sequenced from polyploids, it is difficult to phase them into  
54 their parental subgenomes (Eriksson et al., 2018), and it is easy to mistake  
55 homoeologs (genes duplicated in allopolyploidisation events) for paralogs (genes  
56 arising from duplication within a genome) and vice versa (Brysting et al., 2011;  
57 Linder and Rieseberg, 2004). Approaches to resolving the phylogenetic origins of  
58 tetraploids (but not higher ploidy levels) have determined parental genomes using  
59 heuristic methods (Jones et al., 2013; Lott et al., 2009) or long-read sequences  
60 (Rothfels et al., 2017). While phylogenomic approaches are sometimes used to detect  
61 the presence of hybrid polyploids (McKain et al., 2016; Morales-Briones et al., 2018),  
62 we are not aware of studies that have used phylogenomic data to resolve polyploid  
63 origins.

64

65 Resolving parental origins of polyploid subgenomes unlocks progress in their  
66 genomic characterisation. Knowledge of the origins of the allohexaploid genome of  
67 *Triticum aestivum* (bread wheat) allowed further characterisation to be assisted by  
68 sequencing of the close relatives of its parents: *Aegilops tauschii* and *Triticum*  
69 *turgidum* ssp. *dicoccoides* (Avni et al., 2017; Luo et al., 2017). Similarly, the  
70 allotetraploid genome of *Gossypium hirsutum* (Upland cotton) has been illuminated  
71 by sequencing of two close diploid relatives of its progenitor genomes (Li et al., 2015).  
72 However, for many polyploids of economic and ecological importance, we do not  
73 know the identity of the closest living relatives of their progenitor genomes. We need  
74 accessible phylogenomic approaches to make this possible.

75

76 A relatively inexpensive method of generating genome-wide marker data for  
77 phylogenomics from large numbers of individuals is through sequencing of  
78 restriction-site associated DNA (RAD) libraries with short reads of 50-150 bp. This is  
79 widely used as a method of genome-wide SNP genotyping in non-model organisms  
80 for population genomic analyses (Andrews et al., 2016; Barchi et al., 2011; Emerson  
81 et al., 2010; Etter et al., 2011; Hohenlohe et al., 2010; Zohren et al., 2016). SNP data  
82 from RAD-seq has also been used in phylogenetic reconstruction using supermatrix  
83 approaches which assume that all loci have the same evolutionary history (Cariou et  
84 al., 2013; Cruaud et al., 2014; Eaton and Ree, 2013; Eaton et al., 2016; Gonen et al.,  
85 2015; Hipp et al., 2014; Massatti et al., 2016; Pante et al., 2015; Rubin et al., 2012;  
86 Wagner et al., 2013). A few studies have used species tree approaches, which take into  
87 account the possibility of different evolutionary histories for separate loci, for analysis  
88 of short read RAD-seq data. For example, Eaton and Ree (2013) used RAD loci  
89 inferred from single end reads to build a species tree in the genus *Pedicularis*  
90 (lousewort) (Eaton and Ree, 2013). DaCosta and Sorensen (2016) used single end  
91 reads to construct species trees in two avian genera and Hou et al. (2015) used  
92 paired-end reads to build a species tree for the genus *Diapensia* (pincushion plant)  
93 (DaCosta and Sorensen, 2016; Hou et al., 2015).

94

95 We reasoned that extra power for phylogenetic analysis may be gained by sequencing  
96 RAD libraries with 300 bp paired-end reads and assembling these reads against a  
97 reference genome to generate longer contigs spanning restriction enzyme and variable  
98 sites. These contigs can be aligned to each other and individual phylogenies  
99 reconstructed for each locus, for input into species tree methods, or the alignments  
100 combined, for a supermatrix approach. So far, we are not aware of any studies which  
101 have sequenced longer RAD loci in an attempt to gain greater power for species tree  
102 methods.

103

104 The genus *Betula* (birches) includes about 65 species and subspecies with ranges

105 across the Northern Hemisphere (Ashburner and McAllister, 2016). Some act as  
106 keystone species of forests across Eurasia and North America (Ashburner and  
107 McAllister, 2016). Various birch species are planted for timber, paper, carbon  
108 sequestration and ecological restoration, but some birch species are endangered with  
109 narrow distributions and there is concern about the increasing threat posed by the  
110 bronze birch borer (Muilenburg and Herms, 2012; Shaw et al., 2014). Previous  
111 phylogenetic analyses of *Betula* using nuclear genes (ITS, NIA and ADH), chloroplast  
112 genes (matK and rbcL) and AFLPs provided limited resolution of relationships among  
113 species and partly contradicted each other (Järvinen et al., 2004; Li et al., 2005; Li et  
114 al., 2007; Schenk et al., 2008). In addition, molecular phylogenies based on nuclear  
115 genes contradict some species groupings proposed in a recent monograph based on  
116 morphology, such as the placement of the ecologically and economically important *B.*  
117 *maximowicziana* (monarch birch) (Ashburner and McAllister, 2016; Wang et al.,  
118 2016).

119

120 Hybridisation is frequent and has been extensively documented in *Betula*  
121 (Anamthawat-Jónsson and Tómasson, 1990; Anamthawat-Jónsson and Tómasson,  
122 1999; Anamthawat-Jónsson and Thórsson, 2003; Anamthawat-Jónsson et al., 2010;  
123 Barnes et al., 1974; Eidesen et al., 2015; Johnsson, 1945; Tsuda et al., 2017; Wang et  
124 al., 2014). Polyploidy is also common within *Betula*, with nearly 60% of species  
125 being polyploids (Wang et al., 2016) and ploidy ranging from diploid to dodecaploid  
126 (Ashburner and McAllister, 2016). Some species contain different cytotypes, such as  
127 *B. chinensis* (6x and 8x) (Ashburner and McAllister, 2016). The origins of most  
128 polyploids in the genus are unresolved. One of the best studied is the tetraploid *B.*  
129 *pubescens* (downy birch), with different lines of evidence suggesting as candidate  
130 parents: *B. pendula* based on RAPD markers (Howland et al., 1995), *B. humilis* or *B.*  
131 *nana* based on ADH (Järvinen et al., 2004), *B. humilis* based on morphology (Walters,  
132 1968) or *B. lenta* based on SNPs (Salojarvi et al., 2017). This uncertainty hinders  
133 genomic research on *B. pubescens*, the most widespread birch tree in Europe and  
134 western Asia.

135

136 Here, in order to better resolve the phylogeny of *Betula* and elucidate the parental  
137 origins of its polyploid species we use a RAD-seq approach with reads assembled  
138 against the *B. pendula* reference genome (Salojarvi et al., 2017). We construct the  
139 phylogeny of diploid species using supermatrix and species tree methods. As a  
140 heuristic method for analyzing the origins of the polyploid species, we create a  
141 reference using contigs from all diploid species and compare the genomic similarity  
142 between each polyploid species and all diploids by mapping reads of each polyploid  
143 species to the reference. Polyploid taxa should have a higher level of genetic  
144 similarity to diploids closely related to their ancestors and hence a higher number of  
145 mapped reads. These approaches together yielded a well-resolved history for the  
146 genus *Betula*, including polyploid taxa.

147

## 148 **2. Materials and Methods**

149

### 150 **2.1. Sample collection**

151 Samples were obtained from living collections in Stone Lane Gardens (SL hereafter),  
152 Ness Gardens (N hereafter), the Royal Botanic Garden Edinburgh (RBGE) or  
153 collected from the wild by the research group (Table S1). The genome size of most of  
154 these taxa has been obtained (Wang et al., 2016) and morphological characters were  
155 used to confirm the identity of each taxon sampled. *Alnus inokumae* was chosen as the  
156 outgroup as *Alnus* has been shown to be sister to *Betula* (Li et al., 2007). In addition,  
157 *A. orientalis* and *Corylus avellana* were included for marker development. Herbarium  
158 specimens of most of these samples have been deposited at the Natural History  
159 Museum London and RBGE with accession numbers provided in Table S1.

160

### 161 **2.2. DNA extraction, RAD library preparation and Illumina sequencing**

162 Genomic DNA was isolated from silica-dried cambial tissue or leaves following a  
163 modified 2 X CTAB (cetyltrimethylammonium bromide) protocol (Wang et al., 2013).  
164 The isolated DNA was assessed with a 1.0% agarose gel and measured with a Qubit

165 2.0 Fluorometer (Invitrogen, Life technologies) using Broad-range assay reagents.  
166 RAD libraries were prepared following the protocol of Etter et al. (2011) with slight  
167 modifications (Etter et al., 2011). Briefly, 0.5-1.0 µg of genomic DNA for each sample  
168 was heated at 65°C for 2-3 hours prior to digestion with PstI (New England Biolabs,  
169 UK). This enzyme has a 6 bp recognition site and leaves a 4 bp overhang. Digestion  
170 was followed by ligation of barcoded P1 adapters. Ligated DNA was sheared using a  
171 Bioruptor (KBiosciences, UK) instrument in 1.5 mL tubes (high intensity, duration 30  
172 s followed by a 30 s pause which was repeated eight times). Sheared fragments were  
173 evenly distributed between 100 bp and 1500 bp and fragments of ~600 bp were  
174 selected using Agencourt AMPure XP Beads (New England Biolabs) following a  
175 protocol of double-size selection. Briefly, a ratio of bead:DNA solution of 0.55 was  
176 used to remove large fragments and then a second round of size selection was  
177 conducted, using 5 µl of bead solution concentrated from a starting volume of 20 µl.  
178 After end-repair and A-tailing, the size-selected DNA was ligated to P2 adapters (400  
179 nm) and PCR amplified. PCR amplification was carried out in 25 µl reactions  
180 consisting of 0.46 vol ddH<sub>2</sub>O and template DNA (4-5 ng), 0.5 vol 2×Phusion Master  
181 Mix (New England Biolabs), and 0.04 vol P1 and P2 amplification primers (10 nm),  
182 using the following cycling parameters: 98°C for 30 s followed by 12 cycles of 98°C  
183 for 10 s and 72°C for 60 s. Three or four independent PCR replicates were conducted  
184 for each sample to achieve a sufficient amount of the library. The final library was  
185 quantified using a Bioanalyzer and a Qubit 2.0 Fluorometer (Invitrogen, Life  
186 Technologies) using high-sensitivity assay reagents and was normalized prior to  
187 sequencing. The quantified library was sequenced on an Illumina MiSeq machine  
188 using MiSeq Reagent Kit v3 (Illumina) at the Genome Centre of Queen Mary  
189 University of London.

190

### 191 **2.3. RAD data trimming and demultiplexing**

192 The raw data were trimmed using Trimmomatic (Bolger et al., 2014) in paired-end  
193 mode with the following steps. First, LEADING and TRAILING steps were used to  
194 remove bases from the ends of a read if the quality is below 20. Then a

195 SLIDINGWINDOW step was performed with a window size of 1 and a required  
196 quality of 20. Finally, a MINLENGTH step was used to discard reads shorter than  
197 100bp. FastQC was used to check various parameters of sequence quality in both raw  
198 and trimmed datasets (Andrews, 2014). The trimmed data were demultiplexed, using  
199 the process\_radtags module of Stacks (Catchen et al., 2013).

200

#### 201 **2.4. Reads mapping, sequence alignment and trimming**

202 The whole genome assembly of *B. pendula* (Salojarvi et al., 2017) was used as a  
203 reference for mapping our RAD data, to separate orthologous loci (i.e. mapped  
204 segments of DNA) from paralogous loci (Wang et al., 2013), and to anchor reads with  
205 adjacent restriction cutting sites. Mapping of trimmed reads for each sample was  
206 conducted using the ‘Map Reads to Reference’ tool in the CLC Genomics Workbench  
207 v. 8. A similarity value of 0.8 and the fraction value of 0.8 were applied as the  
208 threshold. Reads with non-specific matches were discarded and any regions with  
209 coverage of below three were removed. A consensus sequence with a minimum contig  
210 length of 300bp was created for each sample. *Betula glandulosa* was excluded from  
211 further analysis because only 216 loci were mapped at a sufficient read depth.  
212 Multiple sequence alignments for individual loci were generated using mafft v.6.903  
213 (Katoh et al., 2005) with default parameters. Aligned sequences were trimmed using  
214 trimAl v1.2rev59 (Capella-Gutierrez et al., 2009); gaps present in 40% of taxa or  
215 above were removed (-gt 0.6).

216

#### 217 **2.5. Species tree inference**

218 Two datasets were used for phylogenetic analysis: dataset 1 (D1 hereafter) includes 20  
219 diploid *Betula* samples and dataset 2 (D2 hereafter) 27 diploid samples. In D2, some  
220 species were represented by more than one sample (Table S2). RAD loci  $\geq 300$ bp in  
221 length that occurred in a minimum of four *Betula* samples were used for gene tree  
222 inference. The gene tree for each locus was estimated using the maximum-likelihood  
223 method (ML) in RAxML v. 8.1.16 (Stamatakis, 2006). A rapid bootstrap analysis with  
224 100 bootstraps and 10 searches was performed under a GTR+GAMMA nucleotide



225 substitution model. The species tree was estimated from the gene trees with  
226 ASTRAL-II v5.5.7 (Mirarab and Warnow, 2015) and ASTRID (Vachaspati and  
227 Warnow, 2015). Branch support in the ASTRAL and ASTRID trees was assessed via  
228 calculation of local posterior probabilities based on the gene tree quartet frequencies  
229 (Sayyari and Mirarab, 2016) and bootstrapped gene trees (Vachaspati and Warnow,  
230 2015), respectively. All loci used for building gene trees and inferring the species trees  
231 were concatenated into a supermatrix, using custom shell scripts, which was analysed  
232 in RAxML v. 8.1.16 using the same settings as above. The consensus tree generated  
233 above was visualised in FigTree v.1.3.1 (<http://tree.bio.ed.ac.uk/software/figtree>).

234

## 235 **2.6. Phylogenetic Networks**

236 We used the Species Networks applying Quartets (SNaQ) method (Solís-Lemus and  
237 Ané, 2016) implemented in the software PhyloNetworks 0.5.0 (Solís-Lemus et al.,  
238 2017) to investigate whether the species tree without hybridisation events or a  
239 phylogenetic network with one or more hybridisation events better describes the  
240 diploid species relationships within *Betula*. Phylogenetic trees generated in RAxML  
241 were used to estimate quartet concordance factors (CFs), which represent the  
242 proportion of genes supporting each possible relationship between each set of four  
243 species. These CFs were then used to reconstruct phylogenetic networks under  
244 incomplete lineage sorting (ILS) and differing numbers of hybridisation events, and to  
245 calculate their respective pseudolikelihoods. To determine whether a tree accounting  
246 for ILS or a network better fits the observed data, we estimated the best phylogenetic  
247 network with hybridisation events ( $h$ ) ranging from 0 to 5 using the phylogeny  
248 obtained with ASTRID as a starting tree. Using a value of  $h=0$  will yield a tree  
249 without reticulation,  $h=1$  will yield a network with a maximum of one reticulation and  
250 so forth. The fit of trees and networks to the data was evaluated based on  
251 pseudo-deviance values, and estimated inheritance probabilities (i.e. the proportion of  
252 genes contributed by each parental population to a hybrid taxon) were visualised. This  
253 test compares the score of each network based on the negative log-pL, where the  
254 network with the lowest value has the best fit.

255

## 256 **2.7. Identification of putative diploid progenitors of polyploid species**

257 We sought to infer the putative origins of polyploid species of *Betula* by  
258 read-mapping. First, we used RAD loci present in at least 15 out of 20 diploid *Betula*  
259 taxa to create a reference; the reference comprised 88,488 sequences in total,  
260 representing 5,045 loci. All the sequences were concatenated and separated with  
261 lengths of 500 Ns. Trimmed reads of polyploid taxa were mapped individually to this  
262 single reference containing loci from all diploid taxa using strict parameters in CLC  
263 Genomic Workbench: a fraction value of 0.9 and a similarity value of at least 0.995.  
264 Reads with non-specific matches were discarded. Any region with a coverage of  
265 below three was removed and the consensus sequences for each polyploid with a  
266 minimum length of 300 bp were extracted. Variable sites were represented by  
267 ambiguity codes in the consensus. Given the fact that the number of loci available for  
268 each diploid species was variable (Table S2), we plotted the proportion of loci in the  
269 reference for each diploid species to which reads from each polyploid species mapped.  
270 We expected a higher proportion of consensus loci to be mapped in those diploids that  
271 were progenitor species of each polyploid species. We therefore sought to identify  
272 diploid progenitors for each polyploid based on the number of mapped consensus loci  
273 assuming that the number of progenitors could not be more than half the ploidy level  
274 of each polyploid. In addition, we mapped reads from diploid species to the reference  
275 containing loci from all diploid taxa using the same parameters as described above.  
276 We found a small number of loci of each diploid were mapped to by reads from other  
277 diploid species, with the exception of *B. calcicola* and *B. potaninii*, for which a  
278 relatively high number of loci (>1000) were mapped in each species by reads from the  
279 other (Fig. S1).

280

## 281 **2.8. Phylogeny incorporating polyploid species**

282 For those polyploids for which we could identify putative diploid parental species, we  
283 separated their homoeologues for each RAD-locus using another concatenated single  
284 reference, similar to the one described in the paragraph above, but this time containing

285 all 50,870 loci present in a minimum of four *Betula* taxa of D1. For each of these  
286 polyploids, we extracted a RAD consensus sequence from each mapped diploid locus,  
287 with a minimum length of 200 bp; we excluded any sequence where the polyploid had  
288 not mapped to their putative parents for that locus. We then excluded loci where reads  
289 from one diploid had mapped to another diploid species (see above - Identification of  
290 putative diploid progenitors of polyploid species). We constructed phylogenies  
291 including the phased polyploid RAD loci with the diploid RAD loci (Fig. S2).  
292 Individual gene trees were constructed in RAxML v. 8.1.16 using the same parameters  
293 as described above (see - Species tree inference) and the species tree was inferred  
294 using ASTRID. The putative diploid progenitors which we included for phylogenetic  
295 analysis are provided in Table S2.

296

## 297 **2.9. Simple sequence repeat analysis**

298 To develop markers for future use in all *Betula* species for population genetic analyses,  
299 mapped consensus sequences with length equal to or greater than 300 bp were mined  
300 for simple sequence repeats (SSR) using the QDD pipeline version 3.1.2 (Meglécz et  
301 al., 2014). Consensus sequences with a repeat motif of 2–5 bp, and repeated a  
302 minimum of five times, were screened using the Downstream QDD pipeline version  
303 3.1.2. Primer pairs were designed within 200 bp flanking regions using PRIMER3  
304 software (Untergasser et al., 2012). The primer table output by the QDD version 3.1.2  
305 pipeline allows selection of the best primer pair design for each SSR locus. We  
306 filtered primer pairs according to parameters provided by QDD version 3.1.2. The  
307 selected SSR loci had: a minimum number of 7 motif repeats within the SSR  
308 sequence; a maximum primer alignment score of 5; a minimum of 20 bp forward and  
309 reverse flanking region between SSR and primer sequences; and a high-quality primer  
310 design without homopolymer, nanosatellite and microsatellite sequence in the primer  
311 or flanking sequences. For polyploid species of *Betula*, *A. inokumae*, *A. orientalis* and  
312 *C. avellana*, we selected SSR loci with a minimum number of 5 motif repeats as a  
313 majority of loci had 5 or 6 motif repeats within the SSR sequence.

314

### 315 **3. Results**

316

#### 317 **3.1. RAD data description**

318 The number of trimmed reads per diploid taxon ranges from 1,065,196 to 2,560,486  
319 (average of 1,508,904) with between 881,333 and 2,252,171 (80.60% - 90.75%)  
320 mapped to the *B. pendula* genome for each of the 27 diploid *Betula* and 707,914  
321 (51.64%) for the outgroup *A. inokumae* (Table S1). In D1, 162 loci are present in all  
322 20 *Betula* diploid taxa and 7,002 present in only four of these (Fig. 1A), whereas for  
323 D2 99 loci are present in all 27 *Betula* diploid individuals and 6,078 present in only  
324 four (Fig. 1B). Contigs of  $\geq 300$ bp, with an average length of 580.8bp - 755.8bp,  
325 varied in number between 13,597 in *A. inokumae* and 30,717 in *B. pendula* (Fig. 1C,  
326 D).

327

#### 328 **3.2. Phylogenetic inference**

329 The concatenated D1 (50,870 loci) and D2 (58,442 loci) datasets include 31,815,738  
330 and 35,859,769 nucleotides with 60.25% and 63.12% missing data (gaps and  
331 undetermined characters), respectively. The three approaches used for phylogenetic  
332 analysis of D1 (ASTRAL, ASTRID and supermatrix) all produced well resolved trees  
333 that split the genus into two major clades. The ASTRAL species tree (Fig. 2A) and  
334 concatenation tree (Fig. 2B) have identical topologies, whereas the ASTRID tree for  
335 this dataset differs in the placement of *B. cordifolia* (Fig. S3). Phylogenetic trees for  
336 D2 inferred with the species tree methods also separate the genus into two major  
337 clades, similar to the D1 trees, but with some differences in the placement of a small  
338 number of taxa within the largest clade (Fig. S4-S5). The concatenation tree of D2  
339 does not recover the same major clades as the other analyses, although these  
340 differences are not well supported (Fig. S6).

341

#### 342 **3.3. Phylogenetic Networks**

343 The pseudolikelihood values of hybrid nodes decreased sharply from  $h = 0$  to  $h = 2$ ,  
344 with only marginal improvements when further increasing the number of

345 hybridisation events (Fig. S7), suggesting the best-fitting phylogenetic model is one  
346 involving two main hybridisation events. The D1 phylogenetic network when  $h = 2$  is  
347 similar to the phylogenetic trees for this dataset (Fig. 3), but with evidence for  
348 hybridisation events involving four separate lineages within the largest of the major  
349 clades.

350

### 351 **3.4. Read-mapping of polyploid species**

352 For 28 of the polyploid species or varieties (80%) the mapping analysis identified two  
353 or more parental lineages (Fig. 4), represented by 17 diploid species (Table 1). Five  
354 polyploids, all with the ploidy level  $\geq 8x$ , have putative progenitors from both of the  
355 two major diploid clades. *Betula nigra* seems not to be the putative progenitor of any  
356 polyploid species whereas *B. humilis* represents the putative parental lineage of up to  
357 nine polyploids (Table 1).

358

### 359 **3.5. Phylogeny incorporating polyploid species**

360 When we included phased homoeologues from polyploids for which we could identify  
361 putative parents in a phylogenetic analysis, for 22 of the 26 the polyploids their  
362 homoeologues form clades with each of the putative parental diploid species (Table 1;  
363 Fig. 5). For example, subgenomes of *B. pubescens* and its varieties formed  
364 monophyletic clades which were sister to *B. pendula* and *B. platyphylla*, respectively.

365

### 366 **3.6. Simple sequence repeat analysis**

367 We developed between 58 and 565 microsatellite primer pairs for the diploid *Betula*  
368 taxa and between 40 and 633 for polyploid *Betula* taxa. In addition, 100, 84 and 41  
369 microsatellite primers pairs were developed for *A. inokumae*, *A. orientalis* and *C.*  
370 *avellana*, respectively (Table S3).

371

## 372 **4. Discussion**

373

#### 374 **4.1. A well resolved diploid phylogeny for *Betula***

375 We used both supermatrix, and more unusually, species tree approaches to construct  
376 phylogenies based on RADseq data. We used longer contigs than is usual with  
377 RADseq (Tripp et al., 2017), with an average length of 675 bp; these contigs were  
378 generated from paired MiSeq reads, mapped to a reference genome (Salojarvi et al.,  
379 2017). The use of multiple gene trees also enabled us to detect evidence for  
380 hybridisation events among diploid species.

381

382 Two major clades were found in all analyses, which were not found by previous  
383 molecular or morphological analyses (Ashburner and McAllister, 2016; Bina et al.,  
384 2016; Järvinen et al., 2004; Li et al., 2005; Li et al., 2007; Nagamitsu et al., 2006;  
385 Schenk et al., 2008; Wang et al., 2016). Interestingly, species of Clade 1 exclusively  
386 have no or very narrow seed wings and species of Clade 2 exclusively have obvious  
387 seed wings. The fact that some species of Clade 2 have very wide geographic  
388 distributions is likely due to their strong dispersal ability. Ashburner and McAllister's  
389 taxonomic sections *Asperae*, *Lentae* and *Nipponobetula* were grouped exclusively  
390 into Clade 1 and sections *Acuminatae*, *Dahuricae*, *Betula*, *Costatae*, were grouped  
391 exclusively into Clade 2, but species of section *Apterocaryon*, which are dwarf in  
392 form, are split between both clades. Within *Apterocaryon*, *B. michauxii*, with a  
393 geographic distribution in North America, is nested into Clade 1 whereas *B. humilis*  
394 and *B. nana*, with a geographic distribution across Eurasia, are nested within Clade 2.  
395 Thus the shrubby dwarf forms are likely due to independent evolution. Independent  
396 evolution of dwarf forms has been occasionally observed in other genera, such as in  
397 *Artemisia* (Tkach et al., 2007) and *Eucalyptus* (Foster et al., 2007). Another trait that  
398 may have evolved independently in the genus is resistance to the bronze birch borer:  
399 species reported to be largely resistant to the bronze birch borer (Muilenburg and  
400 Herms, 2012) are split between the two clades.

401

402 On the basis of the above, we suggest that section *Apterocaryon* should be dissolved,  
403 and *B. michauxii* placed in section *Lentae*, and *B. humilis* and *B. nana* in section

404 *Betula*. In the case of section *Acuminatae*, our analysis shows *B. luminifera* and *B.*  
405 *haninanensis* form a clade, but *B. maximowicziana* is sister to section *Costatae*. The  
406 incongruence between morphology and molecular evidence for these three species is  
407 likely explained by hybridisation as indicated by our phylogenetic network analysis.  
408 We suggest that *B. maximowicziana* should be moved to section *Costatae*. These  
409 changes, taking into account the effects of hybridisation and convergent evolution,  
410 mean that the seven remaining sections of the genus *Betula*, and the three remaining  
411 subgenera proposed by Ashburner and McAllister, are all monophyletic in our diploid  
412 trees.

413

414 We also note that in our analyses, *B. corylifolia*, the single species of section  
415 *Nipponobetula*, was in a monophyletic group with species of section *Asperae*. Such a  
416 relationship has previously been indicated based on ITS (Nagamitsu et al., 2006;  
417 Wang et al., 2016). We therefore suggest that this species is placed in section *Asperae*,  
418 reducing the genus to two sub-genera that correspond to the two major clades of our  
419 diploid phylogenies. These are subgenus *Betula* containing sections *Acuminatae*,  
420 *Costatae*, *Dahuricae* and *Betula*, and subgenus *Aspera* containing sections *Asperae*  
421 and *Lentae*.

422

#### 423 **4.2. Inferring polyploid parentage of *Betula* species**

424 Our results provide novel insights into parental species for a majority of *Betula*  
425 polyploids (Table 1). For example, tetraploids of section *Costatae* (excluding *B. utilis*  
426 ssp. *occidentalis*) have a high proportion of loci mapped to in *B. ashburneri* and *B.*  
427 *costata*, indicating their likely parentage. This is consistent with morphological  
428 characters, based on which Ashburner and McAllister placed these species within  
429 section *Costatae* (Ashburner and McAllister, 2016). The parentage of *B. pubescens*,  
430 which is widely planted, has been controversial for decades and has been suggested as  
431 *B. pendula* (Howland et al., 1995; Walters, 1968), *B. humilis*, *B. nana* (Howland et al.,  
432 1995; Järvinen et al., 2004; Walters, 1968) and *B. lenta* c.f. (Salojärvi et al., 2017).  
433 Here we find *B. pendula* and its sister species *B. platyphylla* to be the most likely



434 parents of *B. pubescens*. We found a relatively low but still a considerable proportion  
435 of mapped loci from *B. pubescens* to *B. nana* and *B. humilis*, but several studies have  
436 found evidence for introgressive hybridisation among these species since the  
437 formation of *B. pubescens* (Bona et al., 2018; Jadwiszczak et al., 2012; Thórsson et al.,  
438 2001) which could account for sequences from *B. nana* and *B. humilis* in *B. pubescens*  
439 genomes. Previous hypotheses for *B. lenta* c.f. as a parental species of *B. papyrifera*  
440 and *B. humilis* cf. as a parental species of *B. ermanii* (Järvinen et al., 2004) were not  
441 supported by our results. Our results also show evidence of complex layering of  
442 hybridisation and polyploidisation events in the history of some taxa. For example, *B.*  
443 *luminifera* and *B. hainanensis* were identified as the extant representatives for the  
444 progenitors of two tetraploids, but they themselves have a possible hybrid origin (or  
445 have been subject to significant introgression) on the basis of the network analysis;  
446 the two tetraploids with *B. luminifera*/*B. hainanensis* identified as progenitors both  
447 have the next highest proportion of loci mapped to in *B. maximowicziana*, which  
448 might suggest the evidence for hybridisation between *B. luminifera*/*B. hainanensis*  
449 and *B. maximowicziana* identified from the network analysis occurred before the  
450 origin of the polyploids. Given such complex evolutionary histories, it is perhaps  
451 unsurprising that for eight of the 35 polyploids, we could not clearly identify all  
452 putative parents. This may also be because these eight polyploids are older than the  
453 polyploids for which we have identified putative parents, and thus more divergent  
454 from the diploid species. Another possibility is that they are derived from diploid  
455 species which are now extinct, have not yet been discovered or were not included in  
456 our phylogenetic analyses (i.e. *B. glandulosa*).

457

## 458 **5. Conclusion**

459 Here, by generating a new phylogenetic hypothesis for *Betula*, and providing new  
460 evidence for the progenitors of many of its polyploid taxa, we have provided a  
461 framework within which the evolution and systematics of the genus can be understood.  
462 Knowledge of the parentage of the allopolyploids, some of which are widespread and  
463 economically important, opens the way for their genomic analysis. The approach we



464 have used is relatively cheap and straightforward and could be applied to many other  
465 plant groups where allopolyploidy has impeded evolutionary analyses.

466

#### 467 **Acknowledgements**

468 This work was funded by Natural Environment Research Council Fellowship  
469 NE/G01504X/1 to R.J.A.B. and was funded by the National Natural Science  
470 Foundation of China (31770230, 31600295) to N.W.

471

#### 472 **Author Contributions**

473 NW and RB conceived the project. NW, RB and HM collected samples. HM  
474 identified the samples based on morphology. NW carried out lab work. NW, JZ and  
475 LK analysed data. NW, RB and LK wrote the manuscript. All the authors contributed  
476 to editing the manuscript.

477

478

479

480 **References**

- 481 Anamthawat-Jónsson, K. and Tómasson, T., 1990. Cytogenetics of hybrid  
482 introgression in Icelandic birch. *Hereditas* 112, 65–70.
- 483 Anamthawat-Jónsson, K. and Tómasson, T., 1999. High frequency of triploid birch  
484 hybrid by *Betula nana* seed parent. *Hereditas* 130, 191–193.
- 485 Anamthawat-Jónsson, K. and Thórsson, A.T., 2003. Natural hybridisation in birch:  
486 triploid hybrids between *Betula nana* and *B. pubescens*. *Plant Cell Tissue and*  
487 *Organ Culture* 75, 99–107.
- 488 Anamthawat-Jónsson, K., Thórsson, A.T., Temsch, E.M. and Greilhuber, J., 2010.  
489 Icelandic birch polyploids-the case of perfect fit in genome size. *Journal of*  
490 *Botany* 347254.
- 491 Andrews, K.R., Good, J.M., Miller, M.R., Luikart, G. and Hohenlohe, P.A., 2016.  
492 Harnessing the power of RADseq for ecological and evolutionary genomics.  
493 *Nature Reviews Genetics* 17, 81–92.
- 494 Andrews, S., 2014. FastQC: a quality control tool for high throughput sequence data.  
495 <http://www.bioinformatics.babraham.ac.uk/projects/fastqc/>.
- 496 Ashburner, K. and McAllister, H.A., 2016. The Genus *Betula*: A Taxonomic Revision  
497 of Birches. Kew Publishing, London.
- 498 Avni, R., Nave, M., Barad, O., Baruch, K., Twardziok, S.O., Gundlach, H., Hale, I.,  
499 Mascher, M., Spannagl, M., Wiebe, K., Jordan, K.W., Golan, G., Deek, J.,  
500 Ben-Zvi, B., Ben-Zvi, G., Himmelbach, A., MacLachlan, R.P., Sharpe, A.G.,  
501 Fritz, A., Ben-David, R., Budak, H., Fahima, T., Korol, A., Faris, J.D.,  
502 Hernandez, A., Mikel, M.A., Levy, A.A., Steffenson, B., Maccaferri, M.,  
503 Tuberosa, R., Cattivelli, L., Faccioli, P., Ceriotti, A., Kashkush, K.,  
504 Pourkheirandish, M., Komatsuda, T., Eilam, T., Sela, H., Sharon, A., Ohad, N.,  
505 Chamovitz, D.A., Mayer, K.F.X., Stein, N., Ronen, G., Peleg, Z., Pozniak, C.J.,  
506 Akhunov, E.D. and Distelfeld, A., 2017. Wild emmer genome architecture and  
507 diversity elucidate wheat evolution and domestication. *Science* 357, 93–96.
- 508 Barchi, L., Lanteri, S., Portis, E., Acquadro, A., Valè, G., Toppino, L. and Rotino, G.L.,  
509 2011. Identification of SNP and SSR markers in eggplant using RAD tag

- 510 sequencing. BMC Genomics 12, 304.
- 511 Barker, M.S., Arrigo, N., Baniaga, A.E., Li, Z. and Levin, D.A., 2016. On the relative  
512 abundance of autopolyploids and allopolyploids. New Phytol 210, 391–398.
- 513 Barnes, B.V., Bruce, P.D. and Sharik, T.L., 1974. Natural hybridization of yellow  
514 birch and white birch. Forest Science 20, 215–221.
- 515 Bina, H., Yousefzadeh, H., Ali, S.S. and Esmailpour, M., 2016. Phylogenetic  
516 relationships, molecular taxonomy, biogeography of *Betula*, with emphasis on  
517 phylogenetic position of Iranian populations. Tree Genet Genomes 12, 84.
- 518 Bolger, A.M., Lohse, M. and Usadel, B., 2014. Trimmomatic: a flexible trimmer for  
519 Illumina sequence data. Bioinformatics 30, 2114–2120.
- 520 Bona, A., Petrova, G. and Jadwiszczak, K.A., 2018. Unfavourable habitat conditions  
521 can facilitate hybridisation between the endangered *Betula humilis* and its  
522 widespread relatives *B. pendula* and *B. pubescens*. Plant Ecology & Diversity,  
523 doi:10.1080/17550874.17552018.11518497.
- 524 Brysting, A.K., Mathiesen, C. and Marcussen, T., 2011. Challenges in polyploid  
525 phylogenetic reconstruction: a case story from the arctic-alpine *Cerastium*  
526 *alpinum* complex. Taxon 60, 333–347.
- 527 Capella-Gutierrez, S., Silla-Martinez, J.M. and Gabaldon, T., 2009. trimAl: a tool for  
528 automated alignment trimming in large-scale phylogenetic analyses.  
529 Bioinformatics 25, 1972–1973.
- 530 Cariou, M., Duret, L. and Charlat, S., 2013. Is RAD-seq suitable for phylogenetic  
531 inference? An in silico assessment and optimization. Ecology and Evolution 3,  
532 846–852.
- 533 Catchen, J., Hohenlohe, P.A., Bassham, S., Amores, A. and Cresko, W.A., 2013.  
534 Stacks: an analysis tool set for population genomics. Mol Ecol 22, 3124–3140.
- 535 Cruaud, A., Gautier, M., Galan, M., Foucaud, J., Saune, L., Genson, G., Dubois, E.,  
536 Nidelet, S., Deuve, T. and Rasplus, J.Y., 2014. Empirical assessment of RAD  
537 sequencing for interspecific phylogeny. Molecular Biology and Evolution 31,  
538 1272–1274.
- 539 DaCosta, J.M. and Sorenson, M.D., 2016. ddRAD-seq phylogenetics based on

- 540 nucleotide, indel, and presence-absence polymorphisms: Analyses of two avian  
541 genera with contrasting histories. *Mol Phylogenet Evol* 94, 122–135.
- 542 Eaton, D.A.R. and Ree, R.H., 2013. Inferring Phylogeny and Introgression using  
543 RADseq Data: An Example from Flowering Plants (*Pedicularis*: Orobanchaceae).  
544 *Syst Biol* 62, 689–706.
- 545 Eaton, D.A.R., Spriggs, E.L., Park, B. and Donoghue, M.J., 2016. Misconceptions on  
546 missing data in RAD-seq phylogenetics with a deep-scale example from  
547 flowering plants. *Syst Biol* 16, syw092.
- 548 Eidesen, P.B., Alsos, I.G. and Brochmann, C., 2015. Comparative analyses of plastid  
549 and AFLP data suggest different colonization history and asymmetric  
550 hybridization between *Betula pubescens* and *B. nana*. *Mol Ecol* 24, 3993–4009
- 551 Emerson, K.J., Merz, C.R., Catchen, J.M., Hohenlohe, P.A., Cresko, W.A., Bradshaw,  
552 W.E. and Holzapfel, C.M., 2010. Resolving postglacial phylogeography using  
553 high-throughput sequencing. *Proceedings of the National Academy of Sciences*  
554 *of the United States of America* 107, 16196–16200.
- 555 Eriksson, J.S., de Sousa, F., Bertrand, Y.J.K., Antonelli, A., Oxelman, B. and Pfeil,  
556 B.E., 2018. Allele phasing is critical to revealing a shared allopolyploid origin of  
557 *Medicago arborea* and *M. strasseri* (Fabaceae). *Bmc Evol Biol* 18, 9.
- 558 Etter, P.D., Bassham, S., Hohenlohe, P.A., Johnson, E.A. and Cresko, W.A., 2011.  
559 SNP discovery and genotyping for evolutionary genetics using RAD sequencing.  
560 In: Orgogonzo, V., Rockman, M.V. (Eds.), *Molecular Methods for Evolutionary*  
561 *Genetics*. Humana Press, NY.
- 562 Folk, R.A., Mandel, J.R. and Freudenstein, J.V., 2017. Ancestral Gene Flow and  
563 Parallel Organellar Genome Capture Result in Extreme Phylogenomic Discord in  
564 a Lineage of Angiosperms. *Syst Biol* 66, 320–337.
- 565 Fontaine, M.C., Pease, J.B., Steele, A., Waterhouse, R.M., Neafsey, D.E., Sharakhov,  
566 I.V., Jiang, X.F., Hall, A.B., Catteruccia, F., Kakani, E., Mitchell, S.N., Wu, Y.C.,  
567 Smith, H.A., Love, R.R., Lawniczak, M.K., Slotman, M.A., Emrich, S.J., Hahn,  
568 M.W. and Besansky, N.J., 2015. Extensive introgression in a malaria vector  
569 species complex revealed by phylogenomics. *Science* 347.

- 570 Foster, S.A., McKinnon, G.E., Steane, D.A., Potts, B.M. and Vaillancourt, R.E., 2007.  
571 Parallel evolution of dwarf ecotypes in the forest tree *Eucalyptus globulus*. *New*  
572 *Phytol* 175, 370–380.
- 573 Gonen, S., Bishop, S.C. and Houston, R.D., 2015. Exploring the utility of  
574 cross-laboratory RAD-sequencing datasets for phylogenetic analysis. *BMC*  
575 *Research Notes* 8, 299.
- 576 Hipp, A.L., Eaton, D.A.R., Cavender-Bares, J., Fitzek, E., Nipper, R. and Manos, P.S.,  
577 2014. A Framework Phylogeny of the American Oak Clade Based on Sequenced  
578 RAD Data. *Plos One* 9.
- 579 Hohenlohe, P.A., Bassham, S., Etter, P.D., Stiffler, N., Johnson, E.A. and Cresko,  
580 W.A., 2010. Population genomics of parallel adaptation in threespine stickleback  
581 using sequenced RAD tags. *PLoS Genetics* 6, e1000862.
- 582 Hou, Y., Nowak, M.D., Mirre, V., Bjora, C.S., Brochmann, C. and Popp, M., 2015.  
583 Thousands of RAD-seq Loci Fully Resolve the Phylogeny of the Highly Disjunct  
584 Arctic-Alpine Genus *Diapensia* (Diapensiaceae). *Plos One* 10, e0140175.
- 585 Howland, D.E., Oliver, R.R. and Davy, A.J., 1995. Morphological and molecular  
586 variation in natural populations of *Betula*. *New Phytol* 130, 117–124.
- 587 Järvinen, P., Palmé, A., Morales, L.O., Länneppää, M., Keinänen, M., Sapanen, T. and  
588 Lascoux, M., 2004. Phylogenetic relationships of *Betula* species (Betulaceae)  
589 based on nuclear ADH and chloroplast matK sequences. *American Journal of*  
590 *Botany* 91, 1834–1845.
- 591 Jadwiszczak, K.A., Banaszek, A., Jabłońska, E. and Sozinov, O.V., 2012. Chloroplast  
592 DNA variation of *Betula humilis* Schrk. in Poland and Belarus. *Tree Genet*  
593 *Genomes* 8, 1017–1030.
- 594 Johnsson, H., 1945. Interspecific hybridization within the genus *Betula*. *Hereditas* 31,  
595 163–176.
- 596 Jones, G., Sagitov, S. and Oxelman, B., 2013. Statistical Inference of Allopolyploid  
597 Species Networks in the Presence of Incomplete Lineage Sorting. *Syst Biol* 62,  
598 467–478.
- 599 Katoh, K., Kuma, K., Toh, H. and Miyata, T., 2005. MAFFT version 5: improvement

- 600 in accuracy of multiple sequence alignment. *Nucleic Acids Research* 33,  
601 511–518.
- 602 Li, F.G., Fan, G.Y., Lu, C.R., Xiao, G.H., Zou, C.S., Kohel, R.J., Ma, Z.Y., Shang,  
603 H.H., Ma, X.F., Wu, J.Y., Liang, X.M., Huang, G., Percy, R.G., Liu, K., Yang,  
604 W.H., Chen, W.B., Du, X.M., Shi, C.C., Yuan, Y.L., Ye, W.W., Liu, X., Zhang,  
605 X.Y., Liu, W.Q., Wei, H.L., Wei, S.J., Huang, G.D., Zhang, X.L., Zhu, S.J.,  
606 Zhang, H., Sun, F.M., Wang, X.F., Liang, J., Wang, J.H., He, Q., Huang, L.H.,  
607 Wang, J., Cui, J.J., Song, G.L., Wang, K.B., Xu, X., Yu, J.Z., Zhu, Y.X. and Yu,  
608 S.X., 2015. Genome sequence of cultivated Upland cotton (*Gossypium hirsutum*  
609 TM-1) provides insights into genome evolution. *Nat Biotechnol* 33, 524–530.
- 610 Li, G., Davis, B.W., Eizirik, E. and Murphy, W.J., 2016. Phylogenomic evidence for  
611 ancient hybridization in the genomes of living cats (Felidae). *Genome Res* 26,  
612 1–11.
- 613 Li, J.H., Shoup, S. and Chen, Z.D., 2005. Phylogenetics of *Betula* (Betulaceae)  
614 inferred from sequences of nuclear ribosomal DNA. *Rhodora* 107, 69–86.
- 615 Li, J.H., Shoup, S. and Chen, Z.D., 2007. Phylogenetic relationships of diploid  
616 species of *Betula* (Betulaceae) inferred from DNA sequences of nuclear nitrate  
617 reductase. *Systematic Botany* 32, 357–365.
- 618 Linder, C.R. and Rieseberg, L.H., 2004. Reconstructing patterns of reticulate  
619 evolution in plants. *American Journal of Botany* 91, 1700–1708.
- 620 Lott, M., Spillner, A., Huber, K.T., Petri, A., Oxelman, B. and Moulton, V., 2009.  
621 Inferring polyploid phylogenies from multiply-labeled gene trees. *Bmc Evol Biol*  
622 9, 216.
- 623 Luo, M.C., Gu, Y.Q., Puiu, D., Wang, H., Twardziok, S.O., Deal, K.R., Huo, N.X.,  
624 Zhu, T.T., Wang, L., Wang, Y., McGuire, P.E., Liu, S.Y., Long, H., Ramasamy,  
625 R.K., Rodriguez, J.C., Van, S.L., Yuan, L.X., Wang, Z.Z., Xia, Z.Q., Xiao, L.C.,  
626 Anderson, O.D., Ouyang, S.H., Liang, Y., Zimin, A.V., Persea, G., Qi, P.,  
627 Ennetzen, J.L.B., Dai, X.T., Dawson, M.W., Muller, H.G., Kugler, K.,  
628 Rivarola-Duarte, L., Spannagl, M., Mayer, K.F.X., Lu, F.H., Bevan, M.W., Leroy,  
629 P., Li, P.C., You, F.M., Sun, Q.X., Liu, Z.Y., Lyons, E., Wicker, T., Salzberg, S.L.,

- 630 Devos, K.M. and Dvorak, J., 2017. Genome sequence of the progenitor of the  
631 wheat D genome *Aegilops tauschii*. *Nature* 551, 498–502.
- 632 Massatti, R., Reznicek, A.A. and Knowles, L.L., 2016. Utilizing RADseq data for  
633 phylogenetic analysis of challenging taxonomic groups: A case study in *Carex*  
634 sect. *Racemosae*. *American Journal of Botany* 103, 337 – 347.
- 635 McKain, M.R., Tang, H., McNeal, J.R., Ayyampalayam, S., Davis, J.I., depamphilis,  
636 C.W., Givnish, T.J., Pires, J.C., Stevenson, D.W. and Leebens-Mack, J.H., 2016.  
637 A Phylogenomic Assessment of Ancient Polyploidy and Genome Evolution  
638 across the Poales. *Genome Biol Evol* 8, 1150–1164.
- 639 Megléc, E., Pech, N., Gilles, A., Dubut, V., Hingamp, P., Trilles, A. and Grenier,  
640 R.e.a., 2014. QDD version 3.1: a user-friendly computer program for  
641 microsatellite selection and primer design revisited: experimental validation of  
642 variables determining genotyping success rate. *Mol Ecol Resour* 14,  
643 1302–1313.
- 644 Mirarab, S. and Warnow, T., 2015. ASTRAL-II: coalescent-based species tree  
645 estimation with many hundreds of taxa and thousands of genes. *Bioinformatics*  
646 31, i44–i52.
- 647 Morales-Briones, D.F., Liston, A. and Tank, D.C., 2018. Phylogenomic analyses  
648 reveal a deep history of hybridization and polyploidy in the Neotropical genus  
649 *Lachemilla* (Rosaceae). *New Phytol* 218, 1668–1684.
- 650 Muilenburg, V.L. and Herms, D.A., 2012. A Review of Bronze Birch Borer  
651 (Coleoptera: Buprestidae) Life History, Ecology, and Management. *Environ*  
652 *Entomol* 41, 1372–1385.
- 653 Nagamitsu, T., Kawahara, T. and Kanazashi, A., 2006. Endemic dwarf birch *Betula*  
654 *apoiensis* (Betulaceae) is a hybrid that originated from *Betula ermanii* and *Betula*  
655 *ovalifolia*. *Plant Species Biology* 21, 19–29.
- 656 Oxelman, B., Brysting, A.K., Jones, G.R., Marcussen, T., Oberprieler, C. and Pfeil,  
657 B.E., 2017. Phylogenetics of Allopolyploids. *Annual Review of Ecology,*  
658 *Evolution, and Systematics* 48, 543–557.

- 659 Pante, E., Abdelkrim, J., Viricel, A., Gey, D., France, S.C., Boisselier, M.C. and  
660 Samadi, S., 2015. Use of RAD sequencing for delimiting species. *Heredity* 114,  
661 450–459.
- 662 Rothfels, C.J., Pryer, K.M. and Li, F.W., 2017. Next-generation polyploid  
663 phylogenetics: rapid resolution of hybrid polyploid complexes using PacBio  
664 single-molecule sequencing. *New Phytol* 213, 413–429.
- 665 Rubin, B.E.R., Ree, R.H. and Moreau, C.S., 2012. Inferring phylogenies from RAD  
666 sequence data. *Plos One* 7, e33394.
- 667 Salojarvi, J., Smolander, O.P., Nieminen, K., Rajaraman, S., Safronov, O., Safdari, P.,  
668 Lamminmaki, A., Immanen, J., Lan, T.Y., Tanskanen, J., Rastas, P., Amiryousefi,  
669 A., Jayaprakash, B., Kammonen, J.I., Hagqvist, R., Eswaran, G., Ahonen, V.H.,  
670 Serra, J.A., Asiegbu, F.O., Barajas-Lopez, J.D., Blande, D., Blokhina, O.,  
671 Blomster, T., Broholm, S., Brosche, M., Cui, F.Q., Dardick, C., Ehonen, S.E.,  
672 Elomaa, P., Escamez, S., Fagerstedt, K.V., Fujii, H., Gauthier, A., Gollan, P.J.,  
673 Halimaa, P., Heino, P.I., Himanen, K., Hollender, C., Kangasjarvi, S., Kauppinen,  
674 L., Kelleher, C.T., Kontunen-Soppela, S., Koskinen, J.P., Kovalchuk, A.,  
675 Karenlampi, S.O., Karkonen, A.K., Lim, K.J., Leppala, J., Macpherson, L.,  
676 Mikola, J., Mouhu, K., Mahonen, A.P., Niinemets, U., Oksanen, E., Overmyer,  
677 K., Palva, E.T., Pazouki, L., Pennanen, V., Puhakainen, T., Poczai, P., Possen,  
678 B.J.H.M., Punkkinen, M., Rahikainen, M.M., Rousi, M., Ruonala, R., van der  
679 Schoot, C., Shapiguzov, A., Sierla, M., Sipila, T.P., Sutela, S., Teeri, T.H.,  
680 Tervahauta, A.I., Vaattovaara, A., Vahala, J., Vetchinnikova, L., Welling, A.,  
681 Wrzaczek, M., Xu, E.J., Paulin, L.G., Schulman, A.H., Lascoux, M., Albert, V.A.,  
682 Auvinen, P., Helariutta, Y. and Kangasjarvi, J., 2017. Genome sequencing and  
683 population genomic analyses provide insights into the adaptive landscape of  
684 silver birch. *Nat Genet* 49, 904–912.
- 685 Sayyari, E. and Mirarab, S., 2016. Fast coalescent-based computation of local branch  
686 support from quartet frequencies. *Molecular Biology and Evolution* 33,  
687 1654–1668.
- 688 Schenk, M.F., Thienpont, C.N., Koopman, W.J.M., Gilissen, L.J.W.J. and Smulders,



- 689 M.J.M., 2008. Phylogenetic relationships in *Betula* (Betulaceae) based on AFLP  
690 markers. *Tree Genet Genomes* 4, 911–924.
- 691 Shaw, K., Stritch, L., Rivers, M., Roy, S., Wilson, B. and Govaerts, R., 2014. The Red  
692 List of Betulaceae. BGCI, Richmond. UK.
- 693 Solís-Lemus, C. and Ané, C., 2016. Inferring phylogenetic networks with maximum  
694 pseudolikelihood under incomplete lineage sorting. *PLoS Genetics* 12,  
695 e1005896.
- 696 Solis-Lemus, C., Bastide, P. and Ane, C., 2017. PhyloNetworks: A Package for  
697 Phylogenetic Networks. *Mol Biol Evol* 34, 3292–3298.
- 698 Stamatakis, A., 2006. RAxML-VI-HPC: maximum likelihood-based phylogenetic  
699 analyses with thousands of taxa and mixed models. *Bioinformatics* 22,  
700 2688–2690.
- 701 Thórsson, T.H., Salmela, E. and Anamthawat-Jónsson, K., 2001. Morphological,  
702 cytogenetic, and molecular evidence for introgressive hybridization in birch.  
703 *Journal of Heredity* 92, 404–408.
- 704 Tkach, N.V., Hoffmann, M.H., Röser, M., Korobkov, A.A. and von Hagen, K.B., 2007.  
705 Parallel evolutionary patterns in multiple lineages of arctic *Artemisia* L.  
706 (Asteraceae). *Evolution* 62, 184–198.
- 707 Tripp, E.A., Tsai, Y.H.E., Zhuang, Y. and Dexter, K.G., 2017. RADseq dataset with 90%  
708 missing data fully resolves recent radiation of *Petalidium* (Acanthaceae) in the  
709 ultra-arid deserts of *Namibia*. *Ecology and Evolution* 7, 7920–7936.
- 710 Tsuda, Y., Semerikov, V., Sebastiani, F., Vendramin, G.G. and M., L., 2017.  
711 Multispecies genetic structure and hybridization in the *Betula* genus across  
712 Eurasia. *Mol Ecol* 26, 589–605
- 713 Untergasser, A., Cutcutache, I., Koressaar, T., Ye, J., Faircloth, B.C., Remm, M. and  
714 Rozen, S.G., 2012. Primer3-new capabilities and interfaces. *Nucleic Acids Res*  
715 40, e115.
- 716 Vachaspati, P. and Warnow, T., 2015. ASTRID: Accurate Species TRees from  
717 Internode Distances. *Bmc Genomics* 16.
- 718 Wagner, C.E., Keller, I., Wittwer, S., Selz, O.M., Mwaiko, S., Greuter, L., Sivasundar,

- 719 A. and Seehausen, O., 2013. Genome-wide RAD sequence data provide  
720 unprecedented resolution of species boundaries and relationships in the Lake  
721 Victoria cichlid adaptive radiation. *Mol Ecol* 22, 787–798.
- 722 Walters, S.M., 1968. *Betula* L. in Britain. *Proceedings of the Botanical Society of the*  
723 *British Isles* 7, 179–180.
- 724 Wang, N., Borrell, J.S., Bodles, W.J.A., Kuttapitiya, A., Nichols, R.A. and Buggs,  
725 R.J.A., 2014. Molecular footprints of the Holocene retreat of dwarf birch in  
726 Britain. *Mol Ecol* 23, 2771–2782.
- 727 Wang, N., McAllister, H.A., Bartlett, P.R. and Buggs, R.J.A., 2016. Molecular  
728 phylogeny and genome size evolution of the genus *Betula* (Betulaceae). *Ann*  
729 *Bot-London* 117, 1023–1035.
- 730 Wang, N., Thomson, M., Bodles, W.J.A., Crawford, R.M.M., Hunt, H.V., Featherstone,  
731 A.W., Pellicer, J. and Buggs, R.J.A., 2013. Genome sequence of dwarf birch  
732 (*Betula nana*) and cross-species RAD markers. *Mol Ecol* 22, 3098–3111.
- 733 Zohren, J., Wang, N., Kardailsky, I., Borrell, J.S., Joecker, A., Nichols, R.A. and  
734 Buggs, R.J.A., 2016. Unidirectional diploid-tetraploid introgression among  
735 British birch trees with shifting ranges shown by restriction site-associated  
736 markers. *Mol Ecol* 25, 2413–2426.
- 737
- 738

739 **Figure legends**

740 **Figure 1** Detailed information of number of shared loci and number of contigs (A)  
741 number of shared loci only in between four and 20 of the diploid *Betula* species of D1;  
742 (B) number of shared loci only in between four and 27 of the diploid *Betula* species of  
743 D2; (C) number of contigs with length above 300bp for *A. inokumae* and each of the  
744 27 diploid *Betula* species of D2; (D) length of contigs for *A. inokumae* and each of the  
745 27 diploid *Betula* species of D2. The whiskers of the boxplot from the bottom to the  
746 top indicate the minimum, the first quartile, the median, the third quartile and the  
747 maximum value of contig length excluding outliers.

748 **Figure 2** Species tree from the maximum likelihood analysis of the 20 *Betula* diploids  
749 of D1 using ASTRAL (A) and the supermatrix (B) approach based on data from  
750 50,870 loci. Asterisks on the branches of (A) indicate local posterior probabilities of 1  
751 and numbers on the branches of (B) are bootstrap support values. The scale bar below  
752 (B) indicates the mean number of nucleotide substitutions per site. Species were  
753 classified according to Ashburner and McAllister (2016).

754 **Figure 3** Best network inferred from SNaQ analysis of the 20 *Betula* diploids of D1  
755 with the number of hybridization events  $h=2$ . Blue lines indicate hybrid edges and  
756 values beside the blue line indicate estimated inheritance probabilities.

757 **Figure 4** Mapping patterns of polyploids to the diploid reference. Numbers on the x  
758 axis indicate number of mapped loci.

759 **Figure 5** Species tree incorporating polyploids from the maximum likelihood analysis  
760 using ASTRID. Species were classified according to Ashburner and McAllister  
761 (2013).

762 **Figure S1** Mapping patterns of the 20 diploid *Betula* species of D1. Numbers on the x  
763 axis indicate number of mapped loci.

764 **Figure S2** The schematic illustration of methods used for analyzing polyploids.

765 **Figure S3** Species tree from the maximum likelihood analysis of the 20 *Betula*  
766 diploids using the ASTRID approach based on 50,870 gene trees. Species were  
767 classified according to Ashburner and McAllister (2016).

768 **Figure S4** Species tree from the maximum likelihood analysis of the 27 *Betula*

769 diploids using the ASTRAL approach based on 58,442 gene trees. Asterisks on the  
770 branches indicate 1.00 local posterior probabilities. Species were classified according  
771 to Ashburner and McAllister (2016).

772 **Figure S5** Species tree from the maximum likelihood analysis of the 27 *Betula*  
773 diploids using the ASTRID approach based on 58,442 gene trees. Numbers above  
774 branches are support values. Marked with star indicates branches with low support  
775 values. Species were classified according to Ashburner and McAllister (2016).

776 **Figure S6** Species tree from the maximum likelihood analysis of the 27 *Betula*  
777 diploids using the supermatrix approach based on 58,442 gene trees. Numbers above  
778 or below branches are support values. The scale bar indicates the mean number of  
779 nucleotide substitutions per site. Species were classified according to Ashburner and  
780 McAllister (2016).

781 **Figure S7** The pseudolikelihood values for the number of hybridization events from 1  
782 to 5.

783

#### 784 **Table legend**

785 **Table 1** Putative diploid progenitors suggested for polyploids of *Betula* and included  
786 for phylogenetic analysis.

787

#### 788 **Supplementary data**

789 **Table S1** Detailed information about *Betula* species used in this study and mapping  
790 results of RADseq.

791 **Table S2** Number of loci for each diploid species represented in the reference.

792 **Table S3** Detailed information about microsatellite markers mined from assembled  
793 contigs of species of *Betula*, *Alnus* and *Corylus*.

794

795

796

797

798

799

800 **Table**

801 **Table 1.** Putative diploid progenitors suggested for polyploids of *Betula* and included  
802 for phylogenetic analysis

| Species <sup>1</sup>                               | Ploidy level | Putative diploid progenitors                                          |
|----------------------------------------------------|--------------|-----------------------------------------------------------------------|
| <i>B. pubescens</i> var. <i>pubescens</i>          | 4            | <i>B. pendula</i> / <i>B. platyphylla</i>                             |
| <i>B. pubescens</i> var. <i>litwinowii</i>         | 4            | <i>B. pendula</i> / <i>B. platyphylla</i>                             |
| <i>B. pubescens</i> var. <i>celtibérica</i>        | 4            | <i>B. pendula</i> / <i>B. platyphylla</i>                             |
| <i>B. pubescens</i> var. <i>pumila</i>             | 4            | <i>B. pendula</i> / <i>B. platyphylla</i>                             |
| <i>B. pubescens</i> var. <i>fragrans</i>           | 4            | <i>B. pendula</i> / <i>B. platyphylla</i>                             |
| <i>B. papyrifera</i>                               | 6            | <i>B. cordifolia</i> / <i>B. populifolia</i> / <i>B. occidentalis</i> |
| <i>B. papyrifera</i> var. <i>commutata</i>         | 6            | <i>B. cordifolia</i> / <i>B. populifolia</i> / <i>B. occidentalis</i> |
| <i>B. pumila</i>                                   | 4            | <i>B. populifolia</i> / <i>B. occidentalis</i>                        |
| <i>B. albosinensis</i>                             | 4            | <i>B. ashburneri</i> / <i>B. costata</i>                              |
| <i>B. albosinensis</i> var. <i>septentrionalis</i> | 4            | <i>B. ashburneri</i> / <i>B. costata</i>                              |
| <i>B. utilis</i> ssp. <i>pratii</i>                | 4            | <i>B. ashburneri</i> / <i>B. costata</i>                              |
| <i>B. utilis</i>                                   | 4            | <i>B. ashburneri</i> / <i>B. costata</i>                              |
| <i>B. ermaninii</i>                                | 4            | <i>B. ashburneri</i> / <i>B. costata</i>                              |
| <i>B. ermaninii</i> var. <i>lanata</i>             | 4            | <i>B. ashburneri</i> / <i>B. costata</i>                              |
| <i>B. cylindrostachya</i>                          | 4            | <i>B. luminifera</i> / <i>B. hainanensis</i>                          |
| <i>B. alnoides</i>                                 | 4            | <i>B. luminifera</i> / <i>B. hainanensis</i>                          |
| <i>B. alleghaniensis</i>                           | 6            | <i>B. lenta</i>                                                       |
| <i>B. murrayana</i>                                | 8            | <i>B. lenta</i> / <i>B. occidentalis</i> / <i>B. populifolia</i>      |
| <i>B. medwediewii</i>                              | 10           | <i>B. humilis</i> / <i>B. lenta</i> / <i>B.</i>                       |

---

|                      |    |                                                                                              |
|----------------------|----|----------------------------------------------------------------------------------------------|
|                      |    | <i>maximowicziana/B. michauxii/B. luminifera</i>                                             |
| <i>B. megrelica</i>  | 12 | <i>B. humilis/B. lenta/B. maximowicziana/B. michauxii/B. luminifera</i>                      |
| <i>B. chinensis</i>  | 6  | <i>B. calcicola/B. potaninii/B. chichibuensis</i>                                            |
| <i>B. chinensis</i>  | 8  | <i>B. calcicola/B. potaninii/B. chichibuensis</i>                                            |
| <i>B. fargesii</i>   | 10 | <i>B. calcicola/B. potaninii/B. chichibuensis</i>                                            |
| <i>B. delavayi</i>   | 6  | <i>B. calcicola/B. potaninii</i>                                                             |
| <i>B. bomiensis</i>  | 4  | <i>B. calcicola/B. potaninii</i>                                                             |
| <i>B. globispica</i> | 10 | <i>B. corylifolia/B. chichibuensis/B. lenta/B. michauxii/B. costata</i>                      |
| <i>B. insignis</i>   | 10 | <i>B. corylifolia/B. chichibuensis/B. lenta/B. michauxii/B. luminifera/B. maximowicziana</i> |

---

803 <sup>1</sup>*B. insignis* (marked in blue) was provided with six putative progenitors due to the  
 804 possible ploidy level either 10 or 12.

805







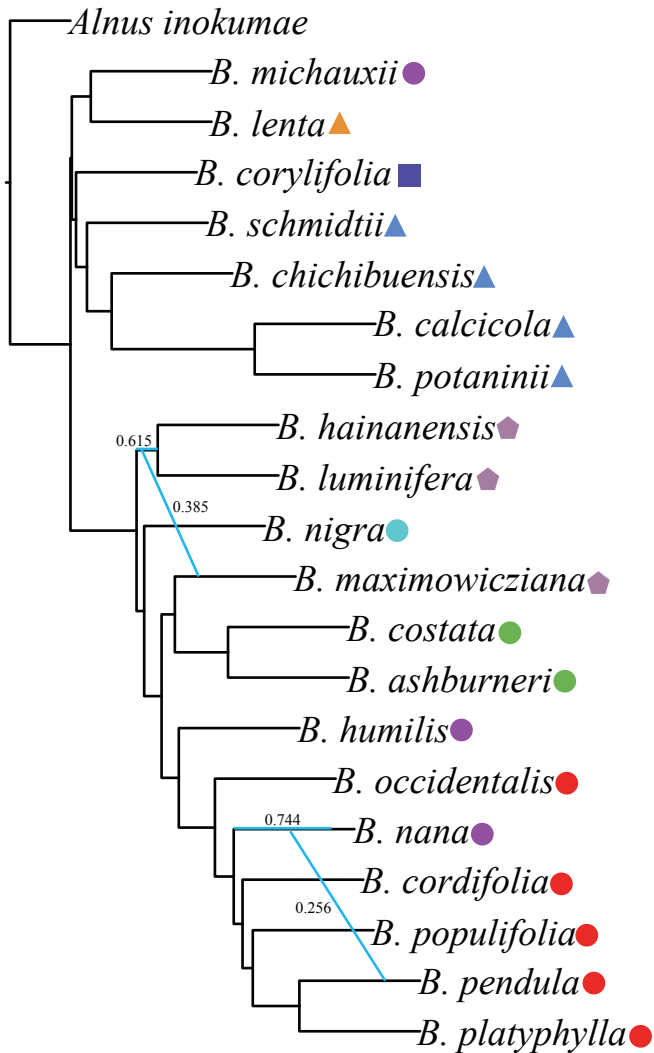

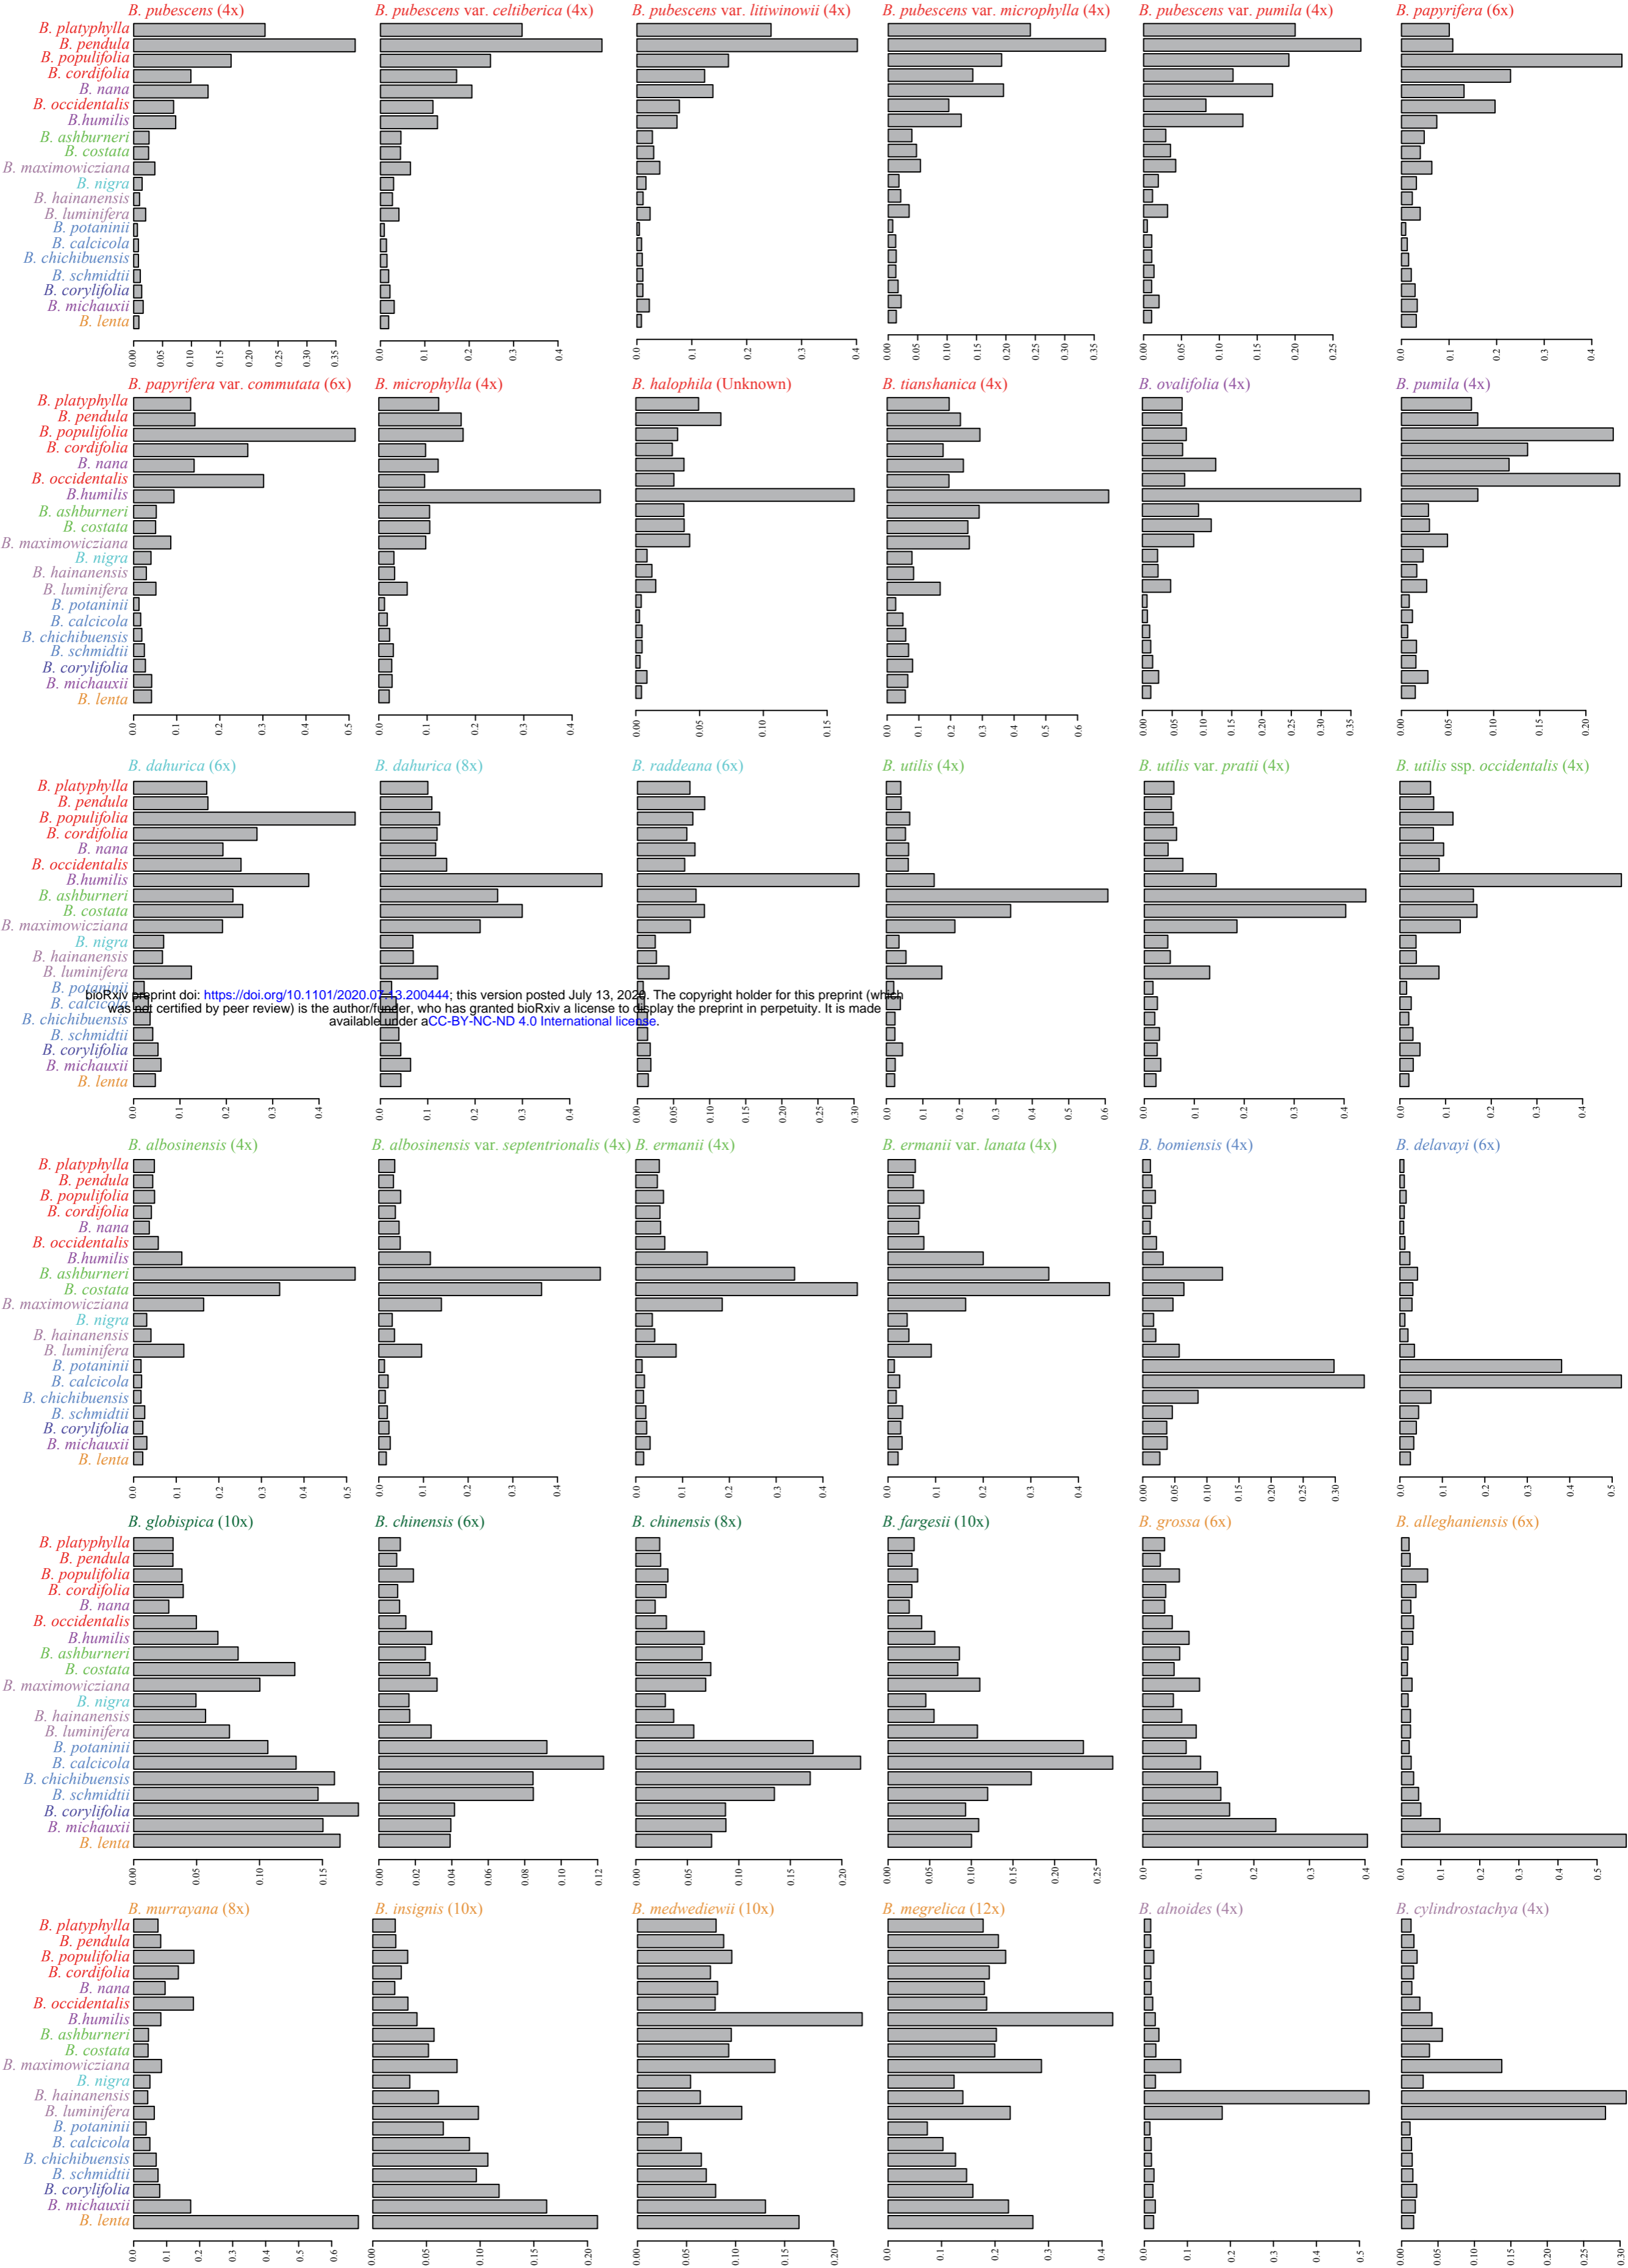

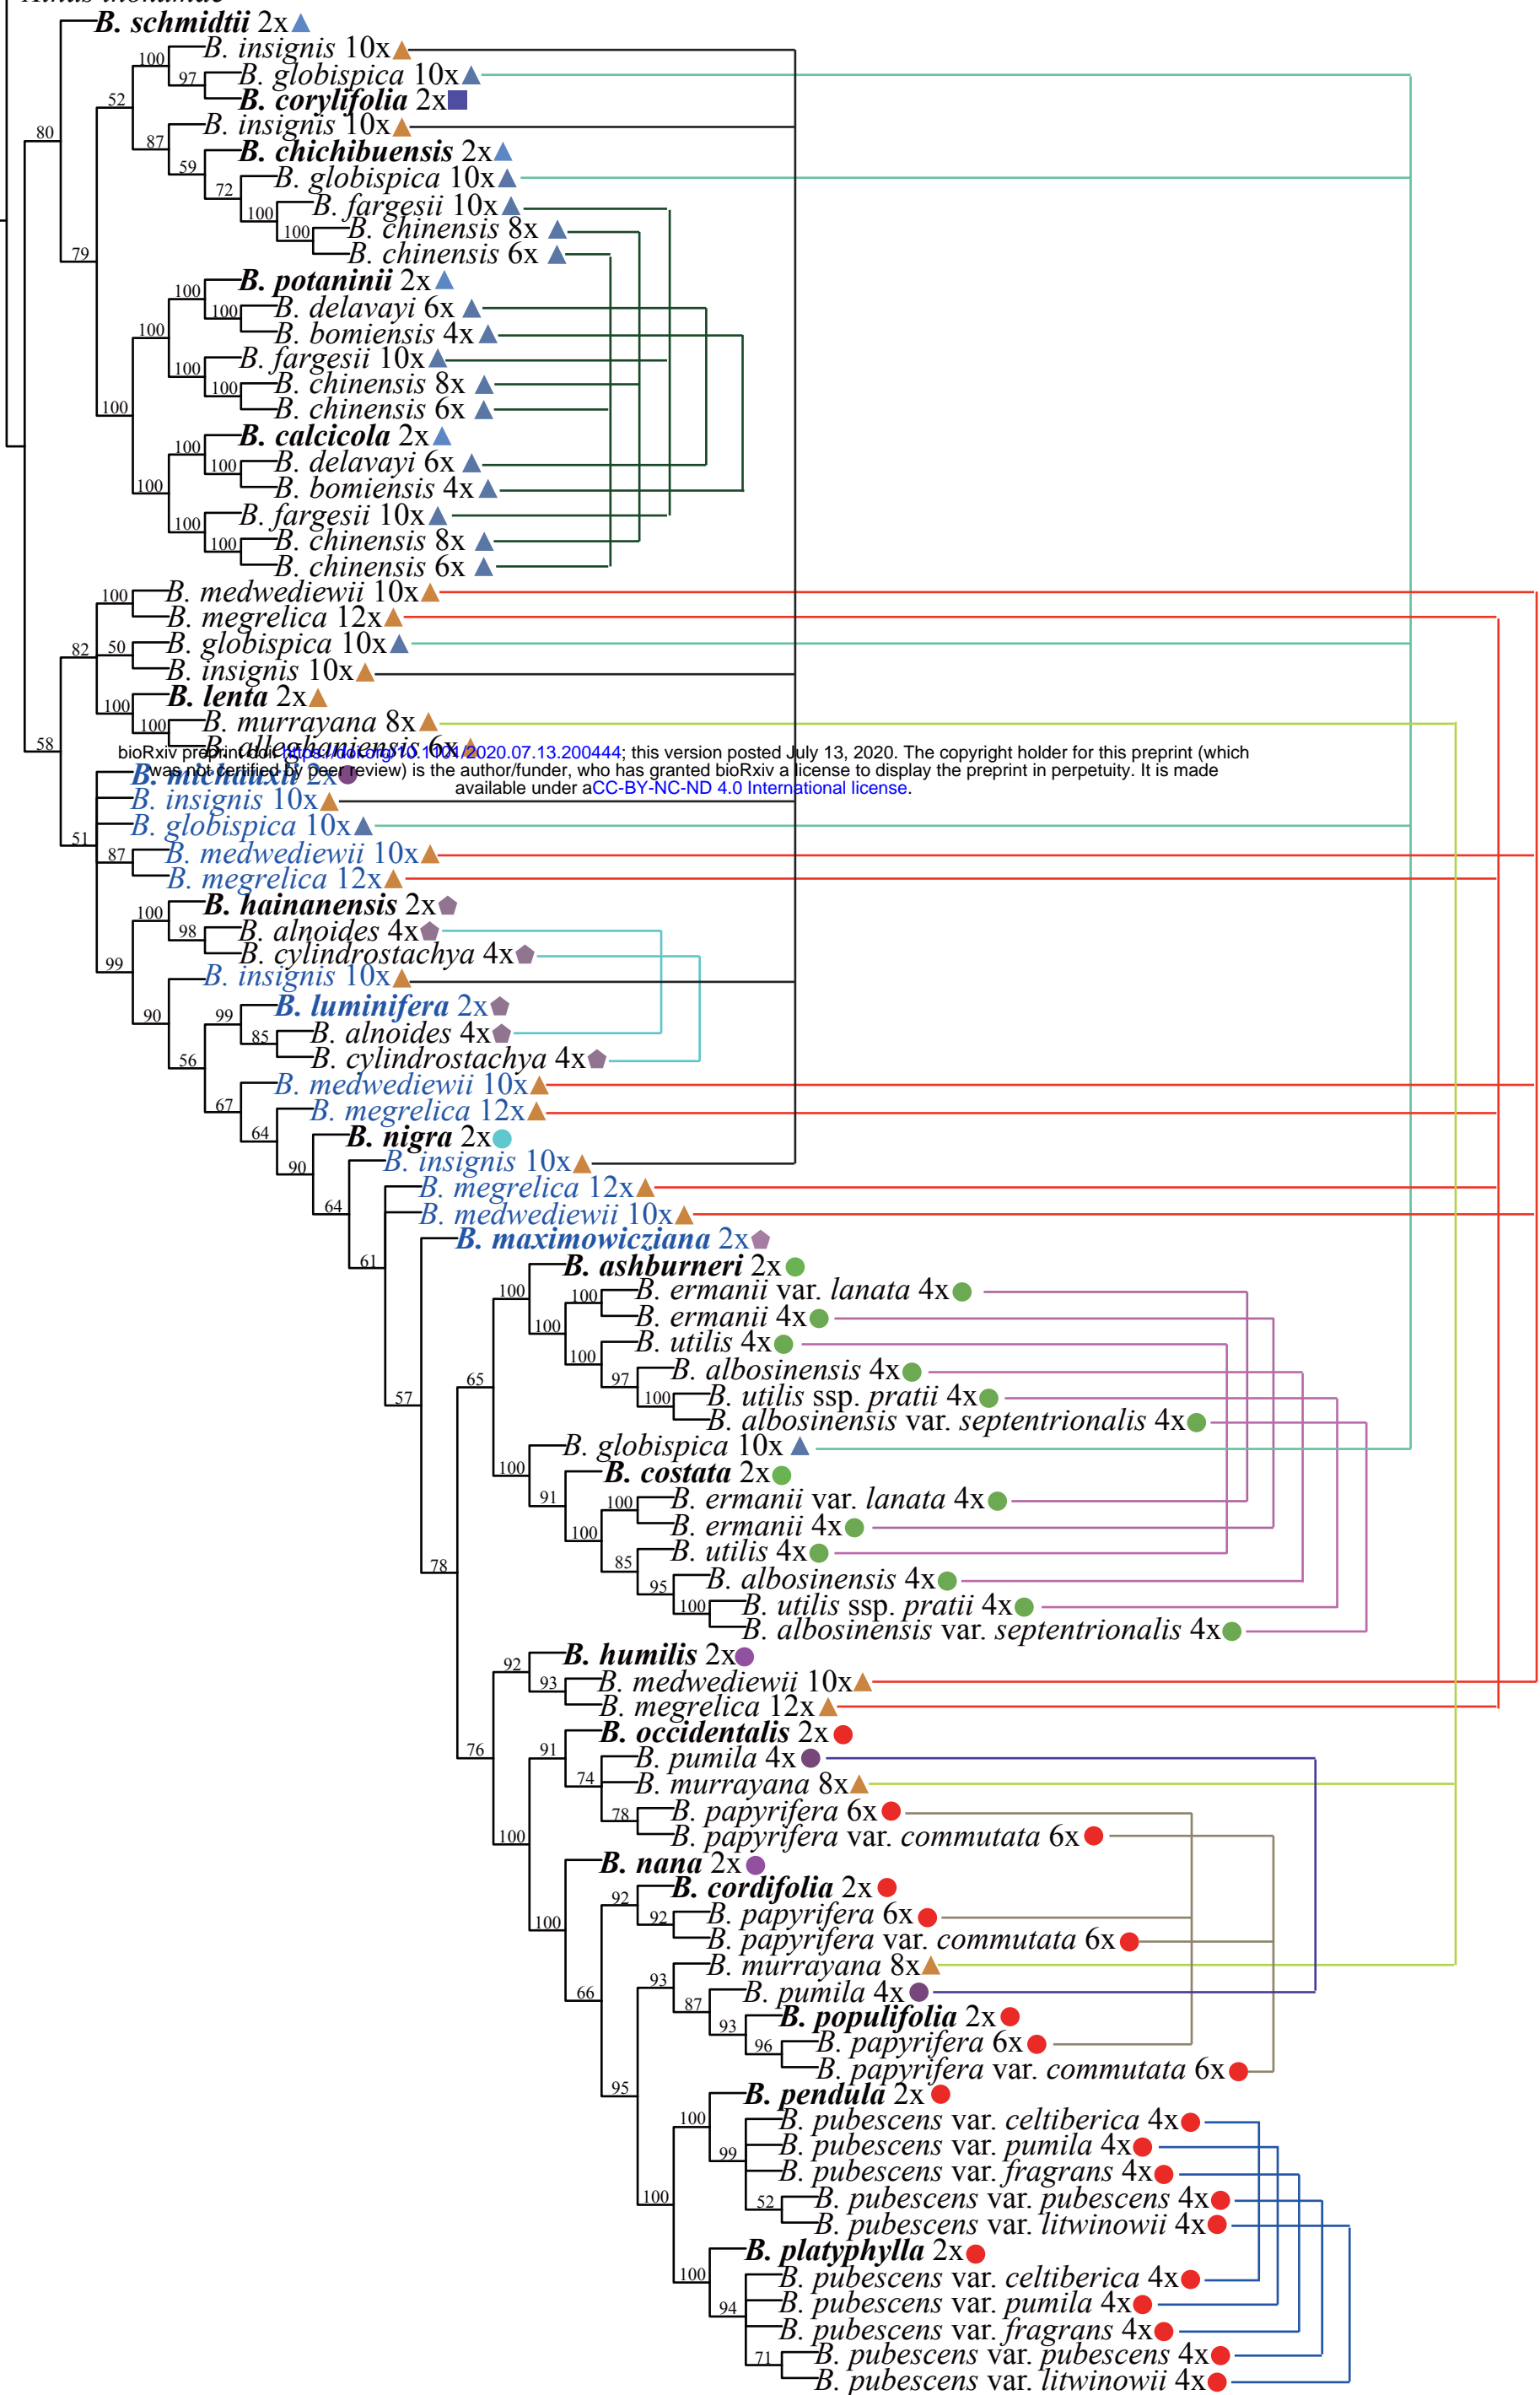

Source: https://www.biorxiv.org/content/10.1101/2020.07.13.200444v1.full.pdf
